# Supplementary material for: CGRP overexpression does not alter depression-like behavior in mice
Source: PeerJ. 2021 Jul 2;9:e11720. doi: 10.7717/peerj.11720 (PMC8256807; doi:10.7717/peerj.11720)
Supplement: Supplemental Information 1 — Effect size analysis was performed by Cohen’s d test. [file peerj-09-11720-s001.xlsx]

## Sheet: Fig.1A B
Fig 1A											Cgrp
CGRP serum	WT	TG			CGRP Hippocampus	WT	TG			mRNA Hippocampus	WT	TG
1	7.65	1661.2			1	2.1	25.8			1	125.416	577.389
2	13.2	1557.28			2	1.5	27			2	57.4111	563.168
3	21.8	1726.84			3	3.7	47.5			3	100.971	1733.8
4	9.5	1637.02			4	1.3	22.6			4	72.878	874.645
5	20	1753.11			5	3.4	32.5			5	96.6625	1411.61
6	21.9				6	2.4				6	146.661	2211.54
mean	15.675	1667.09			mean	2.4	31.08			mean	100	1228.69
SD	6.38167	77.4067			SD	0.979796	9.84972			SD	32.8168	670.38
Cohen's d = (1667.09 - 15.68) ⁄ 54.92273 = 30.067879.					Cohen's d = (31.08 - 2.4) ⁄ 6.999389 = 4.0975.					Cohen's d = (1228.69 - 100) ⁄ 474.597986 = 2.378202.
Effect size	LARGE				Effect size	LARGE				Effect size	LARGE
Fig 1B
	Bdnf				Cfos
mRNA Hippocampus	WT	TG			WT	TG
1	40.576	140.15			16.3108	417.786
2	158.833	195.243			67.0187	528.206
3	104.224	209.404			142.463	642.552
4	69.0983	161.539			150.846	265.535
5	102.726	169.062			123.361	444.776
6	124.542	206.644
mean	100	180.34			100	459.771
SD	41.4128	27.7653			57.0654	139.47
Cohen's d = (180.34 - 100) ⁄ 35.255929 = 2.278766.					Cohen's d = (459.77 - 100) ⁄ 106.557181 = 3.376309.
Effect size	LARGE				Effect size	LARGE

## Sheet: Fig. 1D
locomotion
	WT	TG
1	11.8272	3.2
2	7.55121	1.4
3	11.0084	3.4
4	8.55197	2.6
5	10.0986	4.6
6	6.09555	4.6
7	8.18805	5.4
8	12.1911	0.4
9	8.64295	2
10	9.82566	14.28
mean	9.39807	3.06667
SD	1.94468	1.64012
Cohen's d = (3.07 - 9.4) ⁄ 1.796274 = 3.523961.
Effect size	LARGE

## Sheet: Fig. 1E
Social interaction rate
	WT	TG
1	2.08	0.24
2	2.37	2.5
3	0.71	0.75
4	1.02	1.45
5	0.66	1.3
6	2.58	2.34
7	0.93	0.27
8	1.25	0
9	4.15	1.67
10	3.85	1.81
mean	1.96	1.233
SD	1.27524	0.886517
Cohen's d = (1.23 - 1.45) ⁄ 0.832166 = 0.26437.
Effect size	SMALL
