# Supplementary material for: CGRP overexpression does not alter depression-like behavior in mice
Source: PeerJ. 2021 Jul 2;9:e11720. doi: 10.7717/peerj.11720 (PMC8256807; doi:10.7717/peerj.11720)
Supplement: Supplemental Information 3 — The detection was carried using ImageJ. The values obtained from wild-type mice were set to 100%. [file peerj-09-11720-s003.xlsx]

## Sheet: A　BDNF
BDNF protein
	WT	WT stress	TG	TG stress
1	150.996	77.3857	158.368	139.676
2	72.4682	81.6377	167.417	174.541
3	76.5353	20.7052	173.618	161.139
4	94.31	42.6591	88.8211	105.575
5	91.4521	119.251	115.916	134.905
6	114.238	81.3498	213.31	96.5414

## Sheet: B p-Akt
P-Akt/Akt
	WT	WT stress	TG	TG stress
1	72.4883	77.1989	175.209	106.431
2	127.512	63.9016	199.496	146.539
3	69.2142	109.818	145.376	166.521
4	135.656	83.8735	179.996	89.6261
5	95.1294	106.283	140.101	144.525
6			168.036	109.547

## Sheet: C p-mTOR
P-mTOR/mTOR
	WT	WT stress	TG	TG stress
1	128.47	56.6781	138.964	118.637
2	62.4509	101.781	118.766	49.7168
3	109.079	57.1585	185.589	89.7009
4	73.0552	68.9966	207.271	115.427
5	140.699	166.876	164.755	146.078
6	86.2458		275.758

## Sheet: D p-70S6K
p-P70S6K/P70S6K
	WT	WT stress	TG	TG stress
1	119.062	62.8626	128.573	67.1471
2	88.8801	110.71	117.694	109.754
3	92.0575	84.6969	128.698	94.9514
4	95.2876	83.7942	134.186	122.94
5	115.367	72.0604	106.515	84.8657
6	89.3453		129.224	55.9253
